# Supplementary material for: Cryptic diversity on the genus Caenolestes (Caenolestidae: Paucituberculata) in the Ecuadorian Andes
Source: PeerJ. 2025 Jul 10;13:e19648. doi: 10.7717/peerj.19648 (PMC12256044; doi:10.7717/peerj.19648)
Supplement: Supplemental Information 3 — Uncorrected p-distances (%) based on mitochondrial cytochrome b sequences among samples of Caenolestes. Values below the diagonal represent pairwise genetic distances. The matrix was generated using the software MEGA. [file peerj-13-19648-s003.xls]

## Sheet: MatrixOutput
	KF418779_Lestoros_inca	U34681_Lestoros_inca	AJ508399_Rhyncholestes_raphanurus	KF418782_C_convelatus_Otonga_Cotopaxi_type	QCAZM13017_C_convelatus_Cotopaxi_Sigchos_Otonga	QCAZM16704_C_convelatus_Cotopaxi_Sigchos_Otonga	MECN3726_C_condorensis_Zamora_Chinchipe_Palanda_type	QCAZM18923_C_condorensis_Zamora_Chinchipe_Palanda_Valladolid	KF418781_C_sangay_PNS_Holotype	MECN4349_C_sangay_Morona_Santiago_Zambalan	MECN4330_C_sangay_Morona_Santiago_Zambalan	MECN4331_C_sangay_Morona_Santiago_Zambalan	QCAZM16357_Loja_Amaluza	QCAZM15516_Loja_Jimbura	KF418780_C_caniventer_Peru	QCAZM17851_C_caniventer_Azuay_Giron	MZUAma0338_C_caniventer_Azuay_Santiago_de_Mendez	MECN7918_C_caniventer_Azuay_Sevilla_de_Oro	MECN7729_C_caniventer_Loja_Corazon_de_Oro	MECN7018_Caenolestes_caniventer_El_Oro_Ashigsho	MECN4900_Caenolestes_caniventer_El_Oro_Yacuvinay	MECN4812_Caenolestes_caniventer_El_Oro_Chillacocha	MECN6938_Caenolestes_caniventer_El_Oro_Ashigsho	MECN4811_Caenolestes_caniventer_El_Oro_Chillacocha	MECN7239_Tungurahua_Guamag	MECN7682_Tungurahua_Los_Manteles	MECN6424_Tungurahua_Vizcaya	MECN7838_Carchi_Golondrinas	MECN8042_Carchi_Los_Olivos	MECN7880_Imbabura_Cayapas_Chupa	QCAZM8400_Napo_Papallacta	QCAZM8374_Carchi_Guandera	MECN7816_Imbabura_Sabia_Esperanza	MECN7812_Imbabura_Sabia_Esperanza	MECN7811_Imbabura_Sabia_Esperanza	MECN3745_Imbabura_Bella_Estancia	QCAZM11304_Cotopaxi_Sachapungo	MZUAma0344_Azuay_Labrados	MECN6059_Tungurahua_Faldas_del_Tungurahua	MECN6058_Tungurahua_Faldas_del_Tungurahua	MECN5268_Chimborazo_Cubillines_PNS	MECN5273_Chimborazo_Cubillines_PNS	MECN5269_Chimborazo_Cubillines_PNS	MECN5231_Pichincha_Tambillo_Alto	MECN5242_Pichincha_Tambillo_Alto	3350_Pichincha_Tandayapa	3351_Pichincha_Tandayapa	3344_Pichincha_Tandayapa	AJ508400_Pichincha
KF418779_Lestoros_inca		0.0193939	0.16	0.162325	0.163636	0.162424	0.146667	0.149091	0.161212	0.161212	0.161212	0.161212	0.147879	0.149091	0.168485	0.153939	0.158788	0.153939	0.150303	0.150303	0.150303	0.151515	0.150303	0.149091	0.18303	0.189229	0.179394	0.170909	0.174545	0.175758	0.174545	0.170909	0.169697	0.169697	0.172121	0.186667	0.179394	0.18303	0.18303	0.184242	0.18303	0.18303	0.18303	0.174545	0.17697	0.175758	0.174545	0.175758	0.17697
U34681_Lestoros_inca			0.169729	0.174349	0.166229	0.165354	0.154895	0.156605	0.166061	0.170604	0.170604	0.169729	0.152231	0.153106	0.167273	0.165354	0.167104	0.167104	0.166229	0.16273	0.161855	0.163605	0.16273	0.16098	0.184602	0.191294	0.181102	0.172353	0.178478	0.176728	0.169729	0.167104	0.166229	0.166229	0.167979	0.186352	0.179353	0.183727	0.185477	0.184602	0.185477	0.185477	0.185477	0.175853	0.179353	0.177603	0.176728	0.177603	0.178478
AJ508399_Rhyncholestes_raphanurus				0.164329	0.170604	0.169729	0.154895	0.166229	0.162424	0.163605	0.163605	0.165354	0.160105	0.16098	0.170909	0.170604	0.176728	0.172353	0.177603	0.169729	0.168854	0.171479	0.169729	0.171479	0.190726	0.197022	0.187227	0.181102	0.185477	0.190726	0.183727	0.181977	0.182852	0.182852	0.184602	0.170604	0.183727	0.179353	0.184602	0.186352	0.183727	0.183727	0.183727	0.179353	0.181977	0.182852	0.181977	0.182852	0.183727
KF418782_C_convelatus_Otonga_Cotopaxi_type					0.0300601	0.0300601	0.127479	0.134269	0.136273	0.134269	0.134269	0.134269	0.138277	0.138277	0.144289	0.146293	0.158317	0.150301	0.148297	0.146293	0.148297	0.148297	0.146293	0.150301	0.156313	0.173302	0.160321	0.160321	0.158317	0.152305	0.142285	0.150301	0.152305	0.152305	0.156313	0.148297	0.160321	0.144289	0.144289	0.144289	0.144289	0.144289	0.144289	0.154309	0.152305	0.150301	0.150301	0.150301	0.150301
QCAZM13017_C_convelatus_Cotopaxi_Sigchos_Otonga						0.000874891	0.13259	0.130359	0.129697	0.128609	0.128609	0.127734	0.124234	0.12336	0.13697	0.134733	0.139108	0.134733	0.138233	0.134733	0.133858	0.134733	0.134733	0.133858	0.156605	0.176403	0.163605	0.16098	0.161855	0.154856	0.146982	0.15748	0.158355	0.158355	0.160105	0.15748	0.169729	0.166229	0.164479	0.163605	0.163605	0.163605	0.163605	0.165354	0.165354	0.164479	0.163605	0.164479	0.165354
QCAZM16704_C_convelatus_Cotopaxi_Sigchos_Otonga							0.131351	0.129484	0.128485	0.127734	0.127734	0.126859	0.12336	0.124234	0.135758	0.133858	0.138233	0.133858	0.137358	0.133858	0.132983	0.133858	0.133858	0.132983	0.155731	0.175258	0.16273	0.160105	0.16098	0.153981	0.146107	0.156605	0.15748	0.15748	0.15923	0.156605	0.168854	0.165354	0.163605	0.16273	0.16273	0.16273	0.16273	0.164479	0.164479	0.163605	0.16273	0.163605	0.164479
MECN3726_C_condorensis_Zamora_Chinchipe_Palanda_type								0.00371747	0.0859259	0.0817844	0.0817844	0.0830235	0.0718711	0.0731103	0.0903704	0.0805452	0.086741	0.0755886	0.0817844	0.0842627	0.0855019	0.0855019	0.0842627	0.0842627	0.13259	0.147114	0.130112	0.135068	0.137546	0.135068	0.135068	0.137546	0.138786	0.138786	0.138786	0.138786	0.146221	0.137546	0.138786	0.140025	0.137546	0.137546	0.137546	0.133829	0.135068	0.135068	0.136307	0.135068	0.136307
QCAZM18923_C_condorensis_Zamora_Chinchipe_Palanda_Valladolid									0.0860606	0.0831146	0.0831146	0.0839895	0.0699913	0.0708661	0.0933333	0.0804899	0.0866142	0.0813648	0.0813648	0.0831146	0.0839895	0.0831146	0.0831146	0.0822397	0.135608	0.146621	0.133858	0.141732	0.141732	0.142607	0.139108	0.139108	0.139983	0.139983	0.139983	0.144357	0.149606	0.146107	0.146107	0.146982	0.145232	0.145232	0.145232	0.139983	0.140857	0.143482	0.144357	0.143482	0.144357
KF418781_C_sangay_PNS_Holotype										0.00484848	0.00484848	0.00242424	0.0642424	0.0654545	0.08	0.0690909	0.0787879	0.0690909	0.0715152	0.0727273	0.070303	0.0727273	0.0727273	0.0727273	0.138182	0.14556	0.133333	0.130909	0.134545	0.134545	0.133333	0.134545	0.133333	0.133333	0.135758	0.134545	0.144242	0.139394	0.141818	0.14303	0.140606	0.140606	0.140606	0.134545	0.138182	0.144242	0.14303	0.144242	0.145455
MECN4349_C_sangay_Morona_Santiago_Zambalan											0	0.00262467	0.0586177	0.0594926	0.0775758	0.071741	0.079615	0.0734908	0.0708661	0.0691164	0.0664917	0.0691164	0.0691164	0.0682415	0.134733	0.145475	0.132108	0.136483	0.139108	0.135608	0.132983	0.135608	0.134733	0.134733	0.136483	0.132983	0.142607	0.136483	0.136483	0.137358	0.135608	0.135608	0.135608	0.131234	0.135608	0.134733	0.133858	0.134733	0.135608
MECN4330_C_sangay_Morona_Santiago_Zambalan												0.00262467	0.0586177	0.0594926	0.0775758	0.071741	0.079615	0.0734908	0.0708661	0.0691164	0.0664917	0.0691164	0.0691164	0.0682415	0.134733	0.145475	0.132108	0.136483	0.139108	0.135608	0.132983	0.135608	0.134733	0.134733	0.136483	0.132983	0.142607	0.136483	0.136483	0.137358	0.135608	0.135608	0.135608	0.131234	0.135608	0.134733	0.133858	0.134733	0.135608
MECN4331_C_sangay_Morona_Santiago_Zambalan													0.0594926	0.0603675	0.08	0.0708661	0.0787402	0.0726159	0.0699913	0.0682415	0.0656168	0.0682415	0.0682415	0.0673666	0.135608	0.146621	0.132983	0.137358	0.139983	0.134733	0.133858	0.134733	0.133858	0.133858	0.135608	0.133858	0.143482	0.137358	0.137358	0.138233	0.136483	0.136483	0.136483	0.132108	0.136483	0.137358	0.136483	0.137358	0.138233
QCAZM16357_Loja_Amaluza														0.000874891	0.0593939	0.048119	0.0594926	0.0533683	0.048119	0.048119	0.048119	0.0489939	0.048119	0.048119	0.146982	0.160367	0.143482	0.148731	0.146107	0.148731	0.145232	0.146107	0.145232	0.145232	0.145232	0.139108	0.146107	0.146107	0.144357	0.145232	0.143482	0.143482	0.143482	0.140857	0.144357	0.144357	0.143482	0.144357	0.145232
QCAZM15516_Loja_Jimbura															0.0606061	0.0489939	0.0603675	0.0542432	0.0489939	0.0489939	0.0489939	0.0498688	0.0489939	0.0489939	0.147857	0.161512	0.144357	0.149606	0.146982	0.149606	0.146107	0.146982	0.146107	0.146107	0.146107	0.139983	0.146982	0.146982	0.145232	0.146107	0.144357	0.144357	0.144357	0.141732	0.145232	0.145232	0.144357	0.145232	0.146107
KF418780_C_caniventer_Peru																0.0618182	0.0715152	0.0642424	0.0666667	0.0630303	0.0606061	0.0606061	0.0630303	0.0606061	0.153939	0.158661	0.147879	0.141818	0.140606	0.147879	0.141818	0.147879	0.149091	0.149091	0.151515	0.144242	0.144242	0.147879	0.150303	0.151515	0.149091	0.149091	0.149091	0.13697	0.133333	0.139394	0.140606	0.139394	0.140606
QCAZM17851_C_caniventer_Azuay_Giron																	0.0201225	0.0139983	0.0376203	0.0332458	0.0349956	0.0341207	0.0332458	0.0349956	0.148731	0.163803	0.151356	0.142607	0.148731	0.144357	0.140857	0.143482	0.142607	0.142607	0.144357	0.142607	0.148731	0.148731	0.148731	0.149606	0.147857	0.147857	0.147857	0.139983	0.143482	0.142607	0.143482	0.142607	0.143482
MZUAma0338_C_caniventer_Azuay_Santiago_de_Mendez																		0.0166229	0.0437445	0.0463692	0.0446194	0.0437445	0.0463692	0.0428696	0.148731	0.160367	0.149606	0.146107	0.152231	0.148731	0.143482	0.147857	0.146982	0.146982	0.148731	0.144357	0.151356	0.150481	0.152231	0.153106	0.151356	0.151356	0.151356	0.141732	0.145232	0.144357	0.145232	0.144357	0.145232
MECN7918_C_caniventer_Azuay_Sevilla_de_Oro																			0.0376203	0.040245	0.040245	0.0393701	0.040245	0.0384952	0.146107	0.158076	0.146982	0.137358	0.143482	0.142607	0.137358	0.139983	0.139108	0.139108	0.140857	0.141732	0.153106	0.149606	0.151356	0.152231	0.150481	0.150481	0.150481	0.139108	0.142607	0.141732	0.142607	0.141732	0.142607
MECN7729_C_caniventer_Loja_Corazon_de_Oro																				0.0253718	0.0271216	0.0262467	0.0253718	0.0271216	0.149606	0.162658	0.149606	0.140857	0.146107	0.139108	0.133858	0.139983	0.139108	0.139108	0.139108	0.141732	0.152231	0.146982	0.148731	0.149606	0.147857	0.147857	0.147857	0.139983	0.142607	0.139983	0.140857	0.139983	0.140857
MECN7018_Caenolestes_caniventer_El_Oro_Ashigsho																					0.00524934	0.00437445	0	0.00524934	0.15748	0.168385	0.155731	0.146982	0.149606	0.144357	0.143482	0.146107	0.145232	0.145232	0.146982	0.146107	0.154856	0.151356	0.151356	0.152231	0.150481	0.150481	0.150481	0.142607	0.143482	0.140857	0.141732	0.140857	0.141732
MECN4900_Caenolestes_caniventer_El_Oro_Yacuvinay																						0.00262467	0.00524934	0.00349956	0.155731	0.164948	0.153106	0.145232	0.147857	0.143482	0.142607	0.145232	0.144357	0.144357	0.146107	0.143482	0.152231	0.148731	0.148731	0.149606	0.147857	0.147857	0.147857	0.139983	0.140857	0.138233	0.139108	0.138233	0.139108
MECN4812_Caenolestes_caniventer_El_Oro_Chillacocha																							0.00437445	0.00262467	0.156605	0.167239	0.154856	0.146107	0.148731	0.145232	0.144357	0.146982	0.146107	0.146107	0.147857	0.145232	0.153981	0.150481	0.150481	0.151356	0.149606	0.149606	0.149606	0.141732	0.142607	0.139983	0.140857	0.139983	0.140857
MECN6938_Caenolestes_caniventer_El_Oro_Ashigsho																								0.00524934	0.15748	0.168385	0.155731	0.146982	0.149606	0.144357	0.143482	0.146107	0.145232	0.145232	0.146982	0.146107	0.154856	0.151356	0.151356	0.152231	0.150481	0.150481	0.150481	0.142607	0.143482	0.140857	0.141732	0.140857	0.141732
MECN4811_Caenolestes_caniventer_El_Oro_Chillacocha																									0.155731	0.166094	0.153981	0.146107	0.148731	0.143482	0.144357	0.145232	0.144357	0.144357	0.146107	0.144357	0.153106	0.149606	0.149606	0.150481	0.148731	0.148731	0.148731	0.140857	0.141732	0.139108	0.139983	0.139108	0.139983
MECN7239_Tungurahua_Guamag																										0.0355097	0.0376203	0.0944882	0.0944882	0.0892388	0.0901137	0.0927384	0.0918635	0.0918635	0.0936133	0.0971129	0.0971129	0.0988626	0.0988626	0.0988626	0.101487	0.101487	0.101487	0.0909886	0.0953631	0.0988626	0.0997375	0.0988626	0.0997375
MECN7682_Tungurahua_Los_Manteles																											0.0171821	0.0962199	0.0950745	0.0985109	0.0973654	0.0962199	0.0962199	0.0962199	0.0962199	0.106529	0.106529	0.111111	0.111111	0.111111	0.112257	0.112257	0.112257	0.0985109	0.0985109	0.106529	0.107675	0.106529	0.107675
MECN6424_Tungurahua_Vizcaya																												0.0909886	0.0874891	0.0892388	0.088364	0.0874891	0.0866142	0.0866142	0.088364	0.0988626	0.0971129	0.100612	0.100612	0.0997375	0.0997375	0.0997375	0.0997375	0.0944882	0.096238	0.100612	0.101487	0.100612	0.101487
MECN7838_Carchi_Golondrinas																													0.0253718	0.0839895	0.0787402	0.0804899	0.079615	0.079615	0.0813648	0.096238	0.0979878	0.096238	0.0971129	0.0979878	0.0944882	0.0944882	0.0944882	0.0892388	0.0909886	0.0901137	0.0892388	0.0901137	0.0909886
MECN8042_Carchi_Los_Olivos																														0.0866142	0.0848644	0.0848644	0.0839895	0.0839895	0.0857393	0.0927384	0.0971129	0.0936133	0.0944882	0.0953631	0.0918635	0.0918635	0.0918635	0.0892388	0.0892388	0.0901137	0.0892388	0.0901137	0.0909886
MECN7880_Imbabura_Cayapas_Chupa																															0.0192476	0.0314961	0.0306212	0.0306212	0.032371	0.100612	0.100612	0.0997375	0.0988626	0.0997375	0.096238	0.096238	0.096238	0.0909886	0.0918635	0.096238	0.0953631	0.096238	0.0971129
QCAZM8400_Napo_Papallacta																																0.0367454	0.0358705	0.0358705	0.0376203	0.0971129	0.101487	0.0997375	0.102362	0.103237	0.0997375	0.0997375	0.0997375	0.088364	0.0901137	0.0927384	0.0918635	0.0927384	0.0936133
QCAZM8374_Carchi_Guandera																																	0.000874891	0.000874891	0.00262467	0.100612	0.0979878	0.101487	0.104112	0.104987	0.101487	0.101487	0.101487	0.0918635	0.0936133	0.0979878	0.0971129	0.0979878	0.0988626
MECN7816_Imbabura_Sabia_Esperanza																																		0	0.00174978	0.0997375	0.0971129	0.100612	0.103237	0.104112	0.100612	0.100612	0.100612	0.0909886	0.0927384	0.0971129	0.096238	0.0971129	0.0979878
MECN7812_Imbabura_Sabia_Esperanza																																			0.00174978	0.0997375	0.0971129	0.100612	0.103237	0.104112	0.100612	0.100612	0.100612	0.0909886	0.0927384	0.0971129	0.096238	0.0971129	0.0979878
MECN7811_Imbabura_Sabia_Esperanza																																				0.101487	0.0988626	0.102362	0.104987	0.105862	0.102362	0.102362	0.102362	0.0927384	0.0944882	0.0988626	0.0979878	0.0988626	0.0997375
MECN3745_Imbabura_Bella_Estancia																																					0.0603675	0.0533683	0.0594926	0.0621172	0.0603675	0.0603675	0.0603675	0.0577428	0.0551181	0.0577428	0.0586177	0.0577428	0.0586177
QCAZM11304_Cotopaxi_Sachapungo																																						0.0244969	0.0271216	0.0297463	0.0297463	0.0297463	0.0297463	0.0341207	0.0341207	0.0367454	0.0376203	0.0367454	0.0358705
MZUAma0344_Azuay_Labrados																																							0.00787402	0.0122485	0.0104987	0.0104987	0.0104987	0.0253718	0.0253718	0.0279965	0.0288714	0.0279965	0.0271216
MECN6059_Tungurahua_Faldas_del_Tungurahua																																								0.00437445	0.00262467	0.00262467	0.00262467	0.0279965	0.0297463	0.032371	0.0332458	0.032371	0.0314961
MECN6058_Tungurahua_Faldas_del_Tungurahua																																									0.00612423	0.00612423	0.00612423	0.0306212	0.032371	0.0349956	0.0358705	0.0349956	0.0341207
MECN5268_Chimborazo_Cubillines_PNS																																										0	0	0.0306212	0.032371	0.0349956	0.0358705	0.0349956	0.0341207
MECN5273_Chimborazo_Cubillines_PNS																																											0	0.0306212	0.032371	0.0349956	0.0358705	0.0349956	0.0341207
MECN5269_Chimborazo_Cubillines_PNS																																												0.0306212	0.032371	0.0349956	0.0358705	0.0349956	0.0341207
MECN5231_Pichincha_Tambillo_Alto																																													0.0113736	0.0139983	0.0148731	0.0139983	0.0148731
MECN5242_Pichincha_Tambillo_Alto																																														0.0131234	0.0139983	0.0131234	0.0139983
3350_Pichincha_Tandayapa																																															0.000874891	0	0.000874891
3351_Pichincha_Tandayapa																																																0.000874891	0.00174978
3344_Pichincha_Tandayapa																																																	0.000874891
AJ508400_Pichincha
MECN4940
[truncated: 1 more columns]

## Sheet: Caption
Table. Estimates of Evolutionary Divergence between Sequences
The number of base differences per site from between sequences are shown. This analysis involved 50 nucleotide sequences. Codon positions included were 1st+2nd+3rd+Noncoding. All ambiguous positions were removed for each sequence pair (pairwise deletion o
1. Tamura K., Stecher G., and Kumar S. (2021). MEGA 11: Molecular Evolutionary Genetics Analysis Version 11. Molecular Biology and Evolution https://doi.org/10.1093/molbev/msab120.
2. Stecher G., Tamura K., and Kumar S. (2020). Molecular Evolutionary Genetics Analysis (MEGA) for macOS. Molecular Biology and Evolution 37:1237-1239.
Disclaimer: Although utmost care has been taken to ensure the correctness of the caption, the caption text is provided "as is" without any warranty of any kind. Authors advise the user to carefully check the caption prior to its use for any purpose and re
